# Supplementary material for: Follow the Leader: Preference for Specific Amino Acids Directly Following the Initial Methionine in Proteins of Different Organisms
Source: PubMed Central journal article supplement — Genomics Proteomics Bioinformatics. 2010 Oct 21;8(3):180–9. doi: 10.1016/S1672-0229(10)60020-4 (PMC5054127; doi:10.1016/s1672-0229(10)60020-4), 2010-10-21
Supplement: mmc1.pdf [file mmc1.pdf]

## Supplementary Material

Shemesh, R., *et al.* 2010. Follow the leader: preference for specific amino acids directly following the initial methionine in proteins of different organisms. *Genomics Proteomics Bioinformatics* 8(3): 180-189.

DOI: 10.1016/S1672-0229(10)60020-4

**Table S1 Distribution of the second amino acid in proteins of different phylogenetic groups**

| Amino acid           | A           | C   | D   | E    | F   | G   | H   | I   | K           | L   | M   | N           | P   | Q   | R   | S           | T    | V   | W   | Y   | n      |
|----------------------|-------------|-----|-----|------|-----|-----|-----|-----|-------------|-----|-----|-------------|-----|-----|-----|-------------|------|-----|-----|-----|--------|
| Species              |             |     |     |      |     |     |     |     |             |     |     |             |     |     |     |             |      |     |     |     |        |
| Human                | <b>22.9</b> | 0.8 | 6.2 | 9.1  | 1.8 | 7.5 | 0.9 | 1.5 | 4.6         | 5.5 | 1.6 | 3.6         | 4.9 | 2.4 | 5.0 | <b>11.4</b> | 4.4  | 3.8 | 1.2 | 0.9 | 10,790 |
| Dog                  | <b>17.5</b> | 1.2 | 7.3 | 8.5  | 1.8 | 9.4 | 1.2 | 2.1 | 6.9         | 5.4 | 3.0 | 4.2         | 5.1 | 3.0 | 4.2 | <b>7.9</b>  | 5.4  | 3.3 | 2.1 | 0.3 | 331    |
| Rat                  | <b>22.4</b> | 0.5 | 5.3 | 9.1  | 1.7 | 6.8 | 0.8 | 2.4 | 5.6         | 4.8 | 1.7 | 3.8         | 4.6 | 2.3 | 4.8 | <b>11.6</b> | 5.1  | 4.6 | 0.8 | 1.3 | 8,420  |
| Mouse                | <b>24.1</b> | 0.7 | 5.8 | 9.4  | 2.0 | 6.7 | 0.9 | 1.4 | 4.9         | 5.2 | 1.5 | 3.1         | 5.0 | 2.4 | 4.5 | <b>12.2</b> | 4.3  | 3.5 | 1.2 | 1.0 | 7,764  |
| Chicken              | <b>21.8</b> | 1.3 | 6.0 | 9.0  | 1.9 | 5.9 | 1.7 | 1.2 | 4.7         | 4.4 | 1.7 | 3.7         | 5.4 | 2.4 | 6.6 | <b>10.2</b> | 5.0  | 4.7 | 0.6 | 1.9 | 835    |
| Frog                 | <b>17.1</b> | 1.1 | 6.7 | 9.5  | 3.8 | 5.5 | 1.8 | 1.4 | 4.2         | 4.8 | 2.5 | 4.6         | 5.7 | 2.7 | 3.6 | <b>13.7</b> | 5.7  | 2.9 | 0.0 | 2.7 | 715    |
| Zebrafish            | <b>13.8</b> | 0.6 | 7.9 | 6.5  | 2.8 | 3.1 | 2.5 | 2.5 | 3.7         | 4.8 | 3.7 | 8.7         | 5.1 | 1.7 | 3.1 | <b>15.5</b> | 9.0  | 2.8 | 0.3 | 2.0 | 355    |
| Fruitfly             | <b>14.0</b> | 1.2 | 6.6 | 5.7  | 4.0 | 5.8 | 1.3 | 2.3 | 5.9         | 6.8 | 2.3 | 3.7         | 4.9 | 3.2 | 3.6 | <b>16.3</b> | 4.7  | 5.0 | 1.0 | 1.7 | 2,104  |
| Worm                 | <b>10.0</b> | 1.1 | 5.7 | 4.5  | 3.5 | 5.4 | 1.6 | 3.8 | 5.0         | 6.2 | 1.1 | 5.3         | 4.9 | 2.7 | 5.3 | <b>19.9</b> | 7.9  | 4.3 | 0.5 | 1.4 | 2,566  |
| Trypanosoma          | <b>12.4</b> | 0.0 | 4.7 | 3.1  | 7.8 | 7.8 | 0.8 | 2.3 | 5.4         | 8.5 | 0.8 | 2.3         | 3.9 | 2.3 | 1.6 | <b>21.7</b> | 10.1 | 4.7 | 0.0 | 0.0 | 129    |
| <i>S. cerevisiae</i> | <b>7.9</b>  | 0.7 | 5.3 | 4.3  | 3.7 | 4.6 | 1.4 | 3.2 | 5.9         | 6.6 | 1.6 | 5.4         | 4.4 | 2.6 | 2.9 | <b>23.7</b> | 7.6  | 6.0 | 0.6 | 1.5 | 4,819  |
| <i>S. pombe</i>      | <b>10.9</b> | 0.3 | 6.9 | 6.3  | 3.7 | 5.1 | 0.9 | 2.8 | 5.9         | 5.2 | 0.7 | 5.7         | 4.3 | 2.4 | 3.5 | <b>23.3</b> | 6.4  | 4.2 | 0.6 | 0.9 | 2,672  |
| <i>C. albicans</i>   | <b>8.9</b>  | 0.0 | 2.8 | 1.4  | 5.7 | 2.8 | 0.7 | 4.3 | 6.4         | 7.8 | 1.4 | 4.6         | 5.7 | 2.5 | 3.9 | <b>28.5</b> | 7.1  | 3.9 | 0.0 | 1.4 | 281    |
| <i>P. aeruginosa</i> | <b>11.3</b> | 0.0 | 3.7 | 2.1  | 1.3 | 1.8 | 1.4 | 4.2 | 9.4         | 5.2 | 1.4 | 6.4         | 5.9 | 3.8 | 8.0 | <b>21.3</b> | 10.2 | 1.8 | 0.3 | 0.7 | 1,002  |
| <i>N. crassa</i>     | <b>24.9</b> | 0.6 | 4.5 | 3.4  | 3.6 | 5.0 | 1.4 | 1.7 | 3.6         | 4.5 | 0.8 | 3.4         | 8.4 | 0.8 | 3.6 | <b>19.0</b> | 4.5  | 4.5 | 0.0 | 1.7 | 357    |
| <i>Arabidopsis</i>   | <b>29.6</b> | 0.2 | 5.5 | 10.0 | 1.4 | 8.3 | 0.3 | 2.6 | 5.6         | 2.4 | 1.8 | 3.3         | 2.4 | 1.6 | 3.3 | <b>10.8</b> | 4.5  | 5.1 | 0.3 | 1.0 | 3,056  |
| Maize                | <b>40.9</b> | 0.3 | 4.5 | 6.3  | 1.0 | 6.8 | 0.3 | 2.5 | 3.0         | 3.3 | 1.0 | 1.5         | 2.8 | 2.0 | 5.3 | <b>9.1</b>  | 4.0  | 4.0 | 0.3 | 1.0 | 396    |
| <i>E. coli</i>       | 7.1         | 0.4 | 3.5 | 4.5  | 3.0 | 2.0 | 1.5 | 5.7 | <b>16.7</b> | 6.2 | 2.1 | 8.9         | 2.9 | 4.0 | 6.2 | <b>13.6</b> | 8.1  | 2.1 | 0.4 | 1.2 | 4,474  |
| <i>B. subtilis</i>   | 6.2         | 0.3 | 4.1 | 6.8  | 3.4 | 3.3 | 1.1 | 5.1 | <b>19.7</b> | 6.2 | 1.8 | <b>11.1</b> | 2.0 | 2.6 | 5.1 | 9.7         | 6.7  | 2.7 | 0.4 | 1.7 | 2,651  |
| <i>H. influenzae</i> | 7.5         | 0.4 | 2.7 | 4.2  | 3.1 | 1.7 | 0.9 | 6.4 | <b>18.6</b> | 8.0 | 2.1 | 8.9         | 2.3 | 5.7 | 4.0 | <b>10.3</b> | 9.1  | 2.1 | 0.4 | 1.6 | 1,706  |
| <i>S. pneumonia</i>  | 11.2        | 0.0 | 4.7 | 4.0  | 2.1 | 2.1 | 0.5 | 5.1 | <b>21.9</b> | 4.0 | 0.9 | 6.5         | 2.1 | 1.9 | 4.4 | <b>16.0</b> | 9.3  | 2.3 | 0.2 | 0.9 | 430    |
| <i>Shige lla.</i>    | 7.7         | 0.7 | 4.6 | 4.6  | 2.8 | 1.7 | 1.8 | 6.1 | <b>13.6</b> | 5.7 | 2.4 | 7.0         | 1.7 | 3.5 | 3.9 | <b>18.8</b> | 10.5 | 1.5 | 0.0 | 1.5 | 543    |
| <i>Salmo nella</i>   | 7.4         | 0.0 | 4.0 | 4.5  | 2.6 | 1.4 | 1.4 | 5.4 | <b>13.4</b> | 6.3 | 2.0 | 7.0         | 2.1 | 4.5 | 5.1 | <b>16.1</b> | 13.0 | 2.4 | 0.0 | 1.3 | 759    |

Note: The numbers are presented in percents, “n” represents the total number of proteins analyzed. The most two abundant amino acids in the second position of protein sequences are presented in bold.
